# Supplementary material for: Mix and match—a versatile equilibrium approach for hybrid colloidal synthesis
Source: Royal Society of Chemistry journal article supplement (doi:10.1039/d0sm00202j), 2020-01-01
Supplement: d0sm00202j2.pdf [file d0sm00202j2.pdf]

Supporting Information for

# Mix and Match — a Versatile Equilibrium Approach for Hybrid Colloidal Synthesis

*Matan Yah Ben Zion<sup>\*†‡</sup>, Yaelin Caba<sup>†</sup>, Ruojie Sha<sup>§</sup>, Nadrian C. Seeman<sup>§</sup>, Paul M. Chaikin<sup>†</sup>*

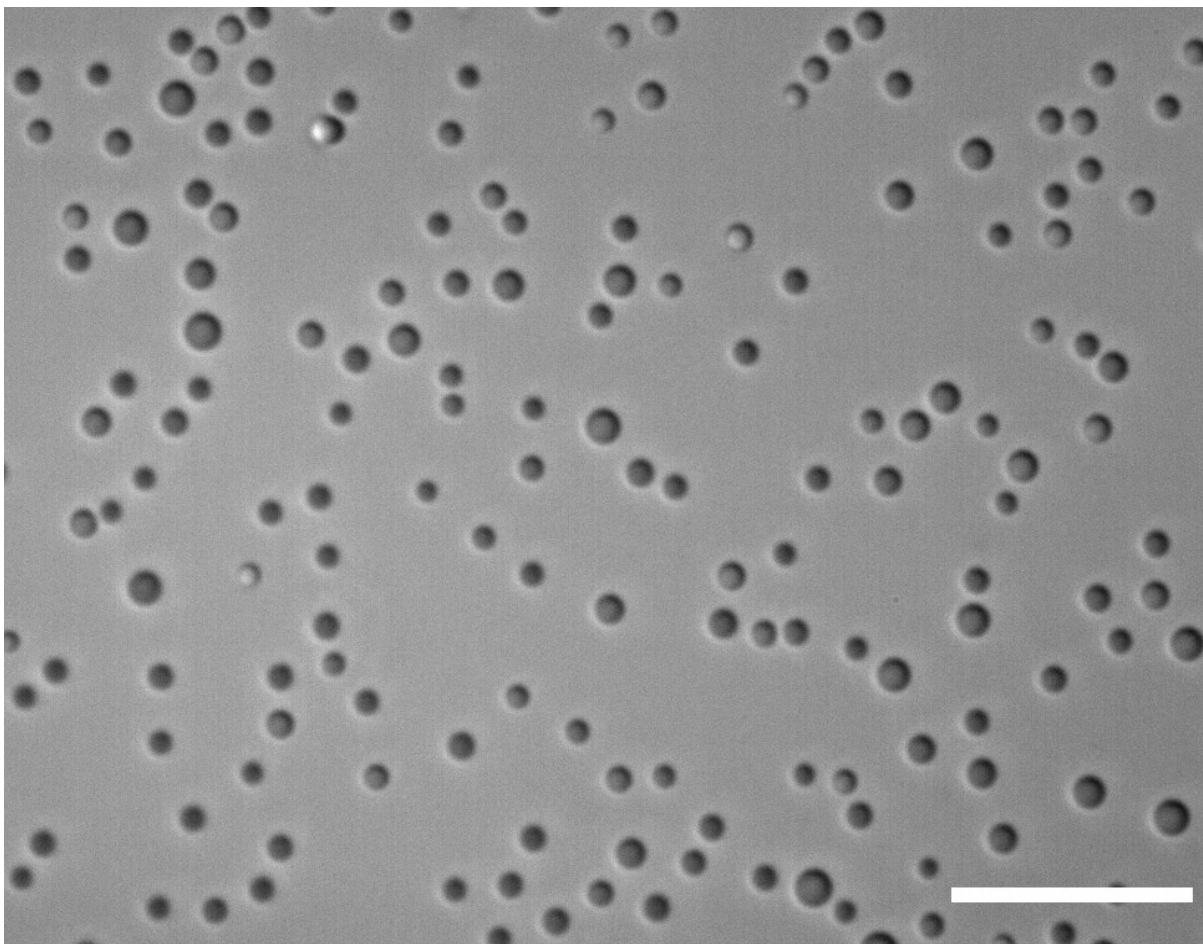

**Figure S1.** n-Tetradecane oil in water emulsion, stabilized with 0.1% w/w SPAN80, synthesized using membrane emulsification. scale bar: 20  $\mu\text{m}$ .

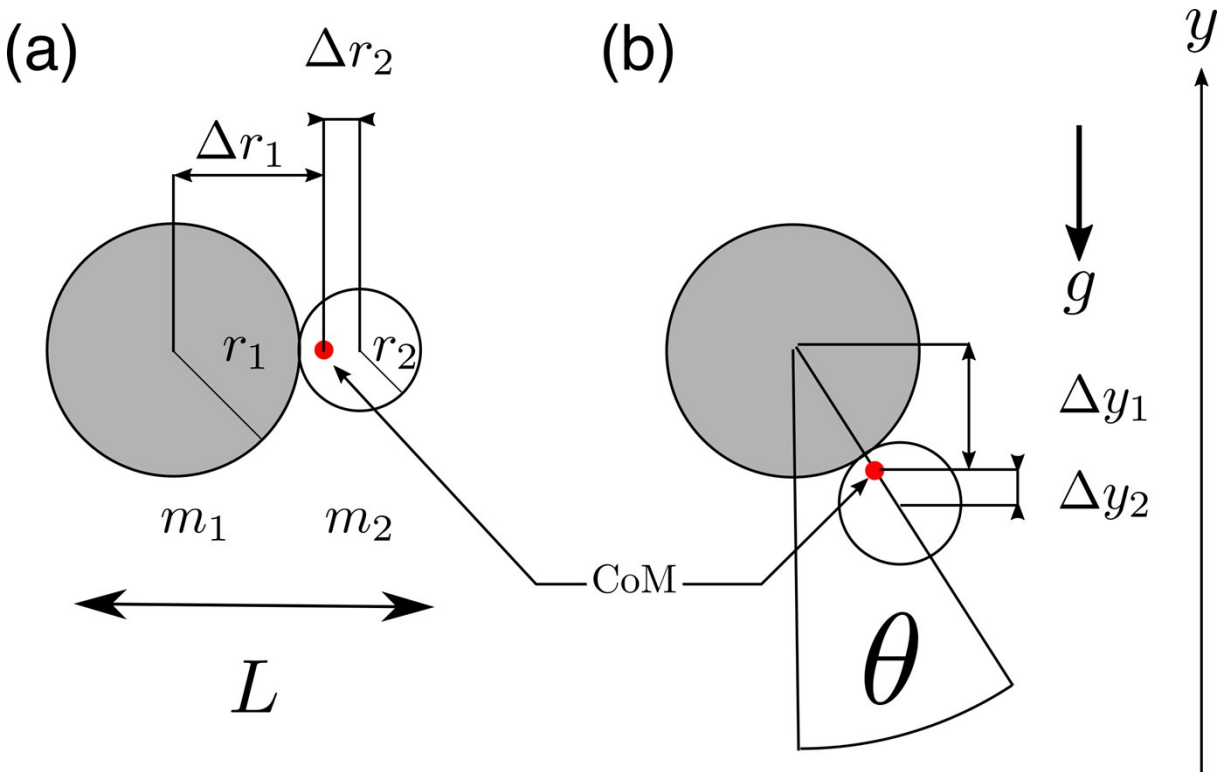

**Figure S2.** Geometrical parameters of the target dimer. a) A dimer of an overall length  $L$  is made of two spheres of each of mass  $m_1$  and  $m_2$ , radius  $r_1$  and  $r_2$ , each displaced from the cluster's Center of Mass (CoM, red dot) by  $\Delta r_1$  and  $\Delta r_2$ , respectively. b) The contribution to the potential energy of having the dimer oriented at angle  $\theta$  relative to gravity is given by the vertical displacement of the center of each sphere from the CoM,  $\Delta y_1$ , and  $\Delta y_2$ . Using the dimers' geometry and mass distribution, we can extract the reduced mass of the particle showing quantitative agreement with the design (see Figure 1b in main text and Supporting Movie 1).
